RESEARCH ARTICLE

# An efficient post-processing adaptive filtering technique to rectifying the flickering effects

Anudeep Gandam<sup>1</sup>, Jagroop Singh Sidhu<sup>2</sup>, Sahil Verma<sup>3</sup>, N. Z. Jhanjhi<sup>4</sup>, Anand Nayyar<sup>5</sup>, Mohamed Abouhawwash<sup>7,8</sup>, Yunyoung Nam<sup>9</sup>

**1** Department of Electronics and Communication Engineering, IKG-Punjab Technical University Jalandhar, Punjab, India, **2** Department of Electronics and Communication Engineering, DAVIET Jalandhar, Punjab, India, **3** Department of Computer Science and Engineering, Chandigarh University, Mohali, Punjab, India, **4** School of Computer Science and Engineering, SCE Taylor's University, Subang Jaya, Malaysia, **5** Graduate School, Duy Tan University, Da Nang, Viet Nam, **6** Faculty of Information Technology, Duy Tan University, Da Nang, Viet Nam, **7** Department of Mathematics, Faculty of Science, Mansoura University, Mansoura, Egypt, **8** Department of Electrical and Computer Engineering, Michigan State University, East Lansing, Michigan, United States of America, **9** Department of Computer Science and Engineering, Soonchunhyang University, Asan, Korea

☞ These authors contributed equally to this work.

\* [ynam@sch.ac.kr](mailto:ynam@sch.ac.kr) (YN); [abouhawwash@msu.edu](mailto:abouhawwash@msu.edu), [saleh1284@mans.edu.eg](mailto:saleh1284@mans.edu.eg) (MA); [sahilverma@ieee.org](mailto:sahilverma@ieee.org) (SV)

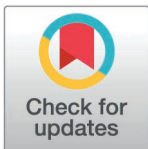

## OPEN ACCESS

**Citation:** Gandam A, Sidhu JS, Verma S, Jhanjhi NZ, Nayyar A, Abouhawwash M, et al. (2021) An efficient post-processing adaptive filtering technique to rectifying the flickering effects. PLoS ONE 16(5): e0250959. <https://doi.org/10.1371/journal.pone.0250959>

**Editor:** Saeed Mian Qaisar, Effat University, SAUDI ARABIA

**Received:** July 10, 2020

**Accepted:** April 19, 2021

**Published:** May 10, 2021

**Copyright:** Due to the similarity of this article with a previously published work, the article contents were removed from *PLoS One* at the time of retraction. Readers are hereby on notice that the removed contents are not offered under the [Creative Commons CC0](https://creativecommons.org/publicdomain/zero/1.0/) public domain dedication; see the accompanying retraction notice for details.

**Data Availability Statement:** The Data Availability statement was deleted at the time of the article's removal. See the accompanying retraction notice for more information.

**Funding:** This research was supported by the MSIT (Ministry of Science and ICT), Korea, under the ICAN (ICT Challenge and Advanced Network of HRD) program (IITP-2021-2020-0-01832) supervised by the IITP (Institute of Information & Communications Technology Planning & Evaluation) and the Soonchunhyang University Research Fund.
